# Supplementary material
Source: ML conference proceedings conference paper supplement (https://proceedings.neurips.cc/paper_files/paper/2017/hash/a82d922b133be19c1171534e6594f754-Abstract.html)
Supplement: Supplementary file [file a82d922b133be19c1171534e6594f754-Supplemental.zip]

## Appendix

**Proof of Theorem 1** Let us proceed with some algebraic manipulations. As the regularized loss function is assumed to be of class  $C^3$  in a neighborhood of the solution, invoking Taylor's theorem notice that

$$\nabla_{\theta} w_{n-1}(z_j; \hat{\theta}_{\lambda}(z^n), \lambda) = \nabla_{\theta} w_{n-1}(z_j; \hat{\theta}_{\lambda}(z^{n \setminus i}), \lambda) \quad (17a)$$

$$+ \nabla_{\theta}^2 w_{n-1}(z_j; \hat{\theta}_{\lambda}(z^{n \setminus i}), \lambda) (\hat{\theta}_{\lambda}(z^n) - \hat{\theta}_{\lambda}(z^{n \setminus i})) \quad (17b)$$

$$+ \frac{1}{2} \sum_{\kappa \in [k]} (\hat{\theta}_{\lambda}(z^n) - \hat{\theta}_{\lambda}(z^{n \setminus i}))^{\top} \left( \frac{\partial}{\partial \theta_{\kappa}} \nabla_{\theta}^2 w_{n-1}(z_j; \zeta_{\lambda, \kappa}^{i, j, 1}(z^n), \lambda) \right) (\hat{\theta}_{\lambda}(z^n) - \hat{\theta}_{\lambda}(z^{n \setminus i})) \hat{e}_{\kappa} \quad (17c)$$

where  $\zeta_{\lambda, \kappa}^{i, j, 1}(z^n) = \alpha_{\kappa}^{i, j, 1} \hat{\theta}_{\lambda}(z^n) + (1 - \alpha_{\kappa}^{i, j, 1}) \hat{\theta}_{\lambda}(z^{n \setminus i})$  for some  $0 \leq \alpha_{\kappa}^{i, j, 1} \leq 1$ . Hence, we can sum both sides up over  $j \in [n] \setminus i$  to get

$$\sum_{j \in [n] \setminus i} \nabla_{\theta} w_{n-1}(z_j; \hat{\theta}_{\lambda}(z^n), \lambda) = \sum_{j \in [n] \setminus i} \nabla_{\theta} w_{n-1}(z_j; \hat{\theta}_{\lambda}(z^{n \setminus i}), \lambda) \quad (18a)$$

$$+ \sum_{j \in [n] \setminus i} \nabla_{\theta}^2 w_{n-1}(z_j; \hat{\theta}_{\lambda}(z^{n \setminus i}), \lambda) (\hat{\theta}_{\lambda}(z^n) - \hat{\theta}_{\lambda}(z^{n \setminus i})) \quad (18b)$$

$$+ \varepsilon_{\lambda, n}^{(i), 1}, \quad (18c)$$

where  $\varepsilon_{\lambda, n}^{(i), 1}$  is defined in (7). Notice that by definition of  $\hat{\theta}_{\lambda}(z^n)$  and  $\hat{\theta}_{\lambda}(z^{n \setminus i})$ , the left hand side term in (18a) is equal to  $-\nabla_{\theta} \ell(z_i; \hat{\theta}_{\lambda}(z^n))$  and the right hand side term is zero. Then,

$$-\nabla_{\theta} \ell(z_i; \hat{\theta}_{\lambda}(z^n)) = \sum_{j \in [n] \setminus i} \nabla_{\theta}^2 w_{n-1}(z_j; \hat{\theta}_{\lambda}(z^{n \setminus i}), \lambda) (\hat{\theta}_{\lambda}(z^n) - \hat{\theta}_{\lambda}(z^{n \setminus i})) + \varepsilon_{\lambda, n}^{(i), 1}. \quad (19)$$

Applying Taylor's theorem on  $\nabla_{\theta}^2 w_{n-1}(z_j; \hat{\theta}_{\lambda}(z^{n \setminus i}), \lambda)$  we get:

$$\begin{aligned} \nabla_{\theta}^2 w_{n-1}(z_j; \hat{\theta}_{\lambda}(z^{n \setminus i}), \lambda) &= \nabla_{\theta}^2 w_{n-1}(z_j; \hat{\theta}_{\lambda}(z^n), \lambda) \\ &+ \sum_{\kappa, \nu \in [k]} (\hat{\theta}_{\lambda}(z^{n \setminus i}) - \hat{\theta}_{\lambda}(z^n))^{\top} \left( \frac{\partial^2}{\partial \theta_{\kappa} \partial \theta_{\nu}} \nabla_{\theta} w_{n-1}(z_j; \zeta_{\lambda, \kappa, \nu}^{i, j, 2}(z^n), \lambda) \right) \hat{e}_{\kappa} \hat{e}_{\nu}^{\top}. \end{aligned} \quad (20)$$

By substituting (20) in (19), using some algebraic manipulations, and noting the definition of  $\varepsilon_{\lambda, n}^{i, j, 2}$  in (8), we can get

$$-\nabla_{\theta} \ell(z_i; \hat{\theta}_{\lambda}(z^n)) = \sum_{j \in [n] \setminus i} \nabla_{\theta}^2 w_{n-1}(z_j; \hat{\theta}_{\lambda}(z^n), \lambda) (\hat{\theta}_{\lambda}(z^n) - \hat{\theta}_{\lambda}(z^{n \setminus i})) + \varepsilon_{\lambda, n}^{(i)}, \quad (21)$$

where  $\varepsilon_{\lambda, n}^{(i)}$  is defined in (6). Consequently,

$$\hat{\theta}_{\lambda}(z^{n \setminus i}) - \hat{\theta}_{\lambda}(z^n) = \left( \sum_{j \in [n] \setminus i} \nabla_{\theta}^2 w_{n-1}(z_j; \hat{\theta}_{\lambda}(z^n), \lambda) \right)^{-1} \nabla_{\theta} \ell(z_i; \hat{\theta}_{\lambda}(z^n)) + \xi_{\lambda, n}^{(i)} \quad (22)$$

$$= \frac{1}{n-1} \left( \hat{\mathcal{H}}_{z^{n \setminus i}}(\hat{\theta}_{\lambda}(z^n), \lambda) \right)^{-1} \nabla_{\theta} \ell(z_i; \hat{\theta}_{\lambda}(z^n)) + \xi_{\lambda, n}^{(i)}, \quad (23)$$

where

$$\xi_{\lambda, n}^{(i)} \triangleq \frac{1}{n-1} \left( \hat{\mathcal{H}}_{z^{n \setminus i}}(\hat{\theta}_{\lambda}(z^n), \lambda) \right)^{-1} \varepsilon_{\lambda, n}^{(i)}. \quad (24)$$

Note that Assumption 1 implies that as  $n$  grows, the above inverse with high probability exists and converges to  $\mathcal{H}(\theta^*)^{-1}$  in probability. Further, the inverse is bounded in probability.

Finally, it is deduced from Assumption 1 that  $\|\widehat{\boldsymbol{\theta}}_{\boldsymbol{\lambda}}(z^n) - \widehat{\boldsymbol{\theta}}_{\boldsymbol{\lambda}}(z^{n \setminus i})\|_{\infty} = o_p(1)$ . On the other hand, by noticing the definition of  $\boldsymbol{\varepsilon}_{\boldsymbol{\lambda},n}^{(i)}$ , we can see that

$$\|\boldsymbol{\varepsilon}_{\boldsymbol{\lambda},n}^{(i)}\|_{\infty} = O_p \left( n \|\widehat{\boldsymbol{\theta}}_{\boldsymbol{\lambda}}(z^n) - \widehat{\boldsymbol{\theta}}_{\boldsymbol{\lambda}}(z^{n \setminus i})\|_{\infty}^2 \right) = o_p \left( n \|\widehat{\boldsymbol{\theta}}_{\boldsymbol{\lambda}}(z^n) - \widehat{\boldsymbol{\theta}}_{\boldsymbol{\lambda}}(z^{n \setminus i})\|_{\infty} \right). \quad (25)$$

Hence, considering (24),

$$\|\boldsymbol{\xi}_{\boldsymbol{\lambda},n}^{(i)}\|_{\infty} = o_p \left( \|\widehat{\boldsymbol{\theta}}_{\boldsymbol{\lambda}}(z^n) - \widehat{\boldsymbol{\theta}}_{\boldsymbol{\lambda}}(z^{n \setminus i})\|_{\infty} \right). \quad (26)$$

Now, considering (23), we deduce that

$$\|\widehat{\boldsymbol{\theta}}_{\boldsymbol{\lambda}}(z^n) - \widehat{\boldsymbol{\theta}}_{\boldsymbol{\lambda}}(z^{n \setminus i})\|_{\infty} = O_p \left( \frac{1}{n} \right). \quad (27)$$

Hence,  $\|\boldsymbol{\varepsilon}_{\boldsymbol{\lambda},n}^{(i)}\|_{\infty} = O_p(1/n)$  in (6). Thus, the error term is

$$\widehat{\boldsymbol{\theta}}_{\boldsymbol{\lambda}}(z^{n \setminus i}) - \widetilde{\boldsymbol{\theta}}_{\boldsymbol{\lambda}}^{(i)}(z^n) = \boldsymbol{\xi}_{\boldsymbol{\lambda},n}^{(i)}, \quad (28)$$

and

$$\|\widehat{\boldsymbol{\theta}}_{\boldsymbol{\lambda}}(z^{n \setminus i}) - \widetilde{\boldsymbol{\theta}}_{\boldsymbol{\lambda}}^{(i)}(z^n)\|_{\infty} = O_p \left( \frac{1}{n^2} \right), \quad (29)$$

completing the proof.  $\blacksquare$

**Proof of Lemma 3** Notice that

$$\begin{aligned} \ell(z_i; \widetilde{\boldsymbol{\theta}}_{\boldsymbol{\lambda}}^{(i)}(z^n)) &= \ell(z_i; \widehat{\boldsymbol{\theta}}_{\boldsymbol{\lambda}}(z^n)) \\ &\quad + \nabla_{\boldsymbol{\theta}}^{\top} \ell(z_i; \widehat{\boldsymbol{\theta}}(z^n)) (\widetilde{\boldsymbol{\theta}}_{\boldsymbol{\lambda}}^{(i)}(z^n) - \widehat{\boldsymbol{\theta}}_{\boldsymbol{\lambda}}(z^n)) \\ &\quad + O(\|\widetilde{\boldsymbol{\theta}}_{\boldsymbol{\lambda}}^{(i)}(z^n) - \widehat{\boldsymbol{\theta}}_{\boldsymbol{\lambda}}(z^n)\|_{\infty}^2) \end{aligned} \quad (30)$$

$$\begin{aligned} &= \ell(z_i; \widehat{\boldsymbol{\theta}}_{\boldsymbol{\lambda}}(z^n)) \\ &\quad + \frac{1}{n-1} \nabla_{\boldsymbol{\theta}}^{\top} \ell(z_i; \widehat{\boldsymbol{\theta}}_{\boldsymbol{\lambda}}(z^n)) \left[ \widehat{\mathcal{H}}_{z^{n \setminus i}}(\widehat{\boldsymbol{\theta}}_{\boldsymbol{\lambda}}(z^n), \boldsymbol{\lambda}) \right]^{-1} \nabla_{\boldsymbol{\theta}} \ell(z_i; \widehat{\boldsymbol{\theta}}_{\boldsymbol{\lambda}}(z^n)) \\ &\quad + O_p \left( \frac{1}{n^2} \right), \end{aligned} \quad (31)$$

where (30) follows from Assumption 1, and (31) follows from the definition of  $\widetilde{\boldsymbol{\theta}}_{\boldsymbol{\lambda}}^{(i)}(z^n)$ , and the fact that

$$\|\widetilde{\boldsymbol{\theta}}_{\boldsymbol{\lambda}}^{(i)}(z^n) - \widehat{\boldsymbol{\theta}}_{\boldsymbol{\lambda}}(z^n)\|_{\infty} \leq \|\widehat{\boldsymbol{\theta}}_{\boldsymbol{\lambda}}(z^{n \setminus i}) - \widetilde{\boldsymbol{\theta}}_{\boldsymbol{\lambda}}^{(i)}(z^n)\|_{\infty} + \|\widehat{\boldsymbol{\theta}}_{\boldsymbol{\lambda}}(z^n) - \widehat{\boldsymbol{\theta}}_{\boldsymbol{\lambda}}(z^{n \setminus i})\|_{\infty} \quad (32)$$

$$= O_p \left( \frac{1}{n^2} \right) + O_p \left( \frac{1}{n} \right) = O_p \left( \frac{1}{n} \right), \quad (33)$$

which implies  $\|\widehat{\boldsymbol{\theta}}_{\boldsymbol{\lambda}}(z^n) - \widetilde{\boldsymbol{\theta}}_{\boldsymbol{\lambda}}^{(i)}(z^n)\|_{\infty}^2 = O_p(1/n^2)$ . The proof is completed by noticing the definition of  $\widehat{\text{ACV}}_{\boldsymbol{\lambda}}(z^n)$  in (11).  $\blacksquare$

**Proof of Lemma 4** By definition,

$$\nabla_{\boldsymbol{\theta}} \widehat{\mathcal{L}}_{z^n}(\widehat{\boldsymbol{\theta}}_{\boldsymbol{\lambda}}(z^n)) + \frac{1}{n} \nabla_{\boldsymbol{\theta}} \mathbf{r}(\widehat{\boldsymbol{\theta}}_{\boldsymbol{\lambda}}(z^n)) \boldsymbol{\lambda} = \nabla_{\boldsymbol{\theta}} \widehat{\mathcal{W}}_{z^n}(\widehat{\boldsymbol{\theta}}_{\boldsymbol{\lambda}}(z^n)) = 0. \quad (34)$$

Using the implicit function theorem, we can further differentiate the left-hand-side with respect to  $\boldsymbol{\lambda}$  to get:

$$\nabla_{\boldsymbol{\theta}}^2 \widehat{\mathcal{L}}_{z^n}(\widehat{\boldsymbol{\theta}}_{\boldsymbol{\lambda}}(z^n)) \nabla_{\boldsymbol{\lambda}} \widehat{\boldsymbol{\theta}}_{\boldsymbol{\lambda}}(z^n) + \frac{1}{n} \nabla_{\boldsymbol{\theta}} \mathbf{r}(\widehat{\boldsymbol{\theta}}_{\boldsymbol{\lambda}}(z^n)) + \frac{1}{n} \sum_{m \in [M]} \lambda_m \nabla_{\boldsymbol{\theta}}^2 r_m(\widehat{\boldsymbol{\theta}}_{\boldsymbol{\lambda}}(z^n)) \nabla_{\boldsymbol{\lambda}} \widehat{\boldsymbol{\theta}}_{\boldsymbol{\lambda}}(z^n) = 0. \quad (35)$$

Thus,

$$\widehat{\mathcal{H}}_{z^n}(\widehat{\boldsymbol{\theta}}_{\boldsymbol{\lambda}}(z^n), \boldsymbol{\lambda}) \nabla_{\boldsymbol{\lambda}} \widehat{\boldsymbol{\theta}}_{\boldsymbol{\lambda}}(z^n) = -\frac{1}{n} \nabla_{\boldsymbol{\theta}} \mathbf{r}(\widehat{\boldsymbol{\theta}}_{\boldsymbol{\lambda}}(z^n)), \quad (36)$$

which completes the proof.  $\blacksquare$

**Proof of Corollary 5** This directly follows from Lemma 4.  $\blacksquare$
